# Supplementary material for: Effect of Baseline Characteristics and Tumor Burden on Vaspin Expression and Progressive Disease in Operable Colorectal Cancer
Source: MDPI journal article supplement (doi:10.3390/diagnostics10100801), 2020-10-09

Figure S1. The negative control of immunostaining shown no vaspin expression for specificity of the staining in colorectal cancer.

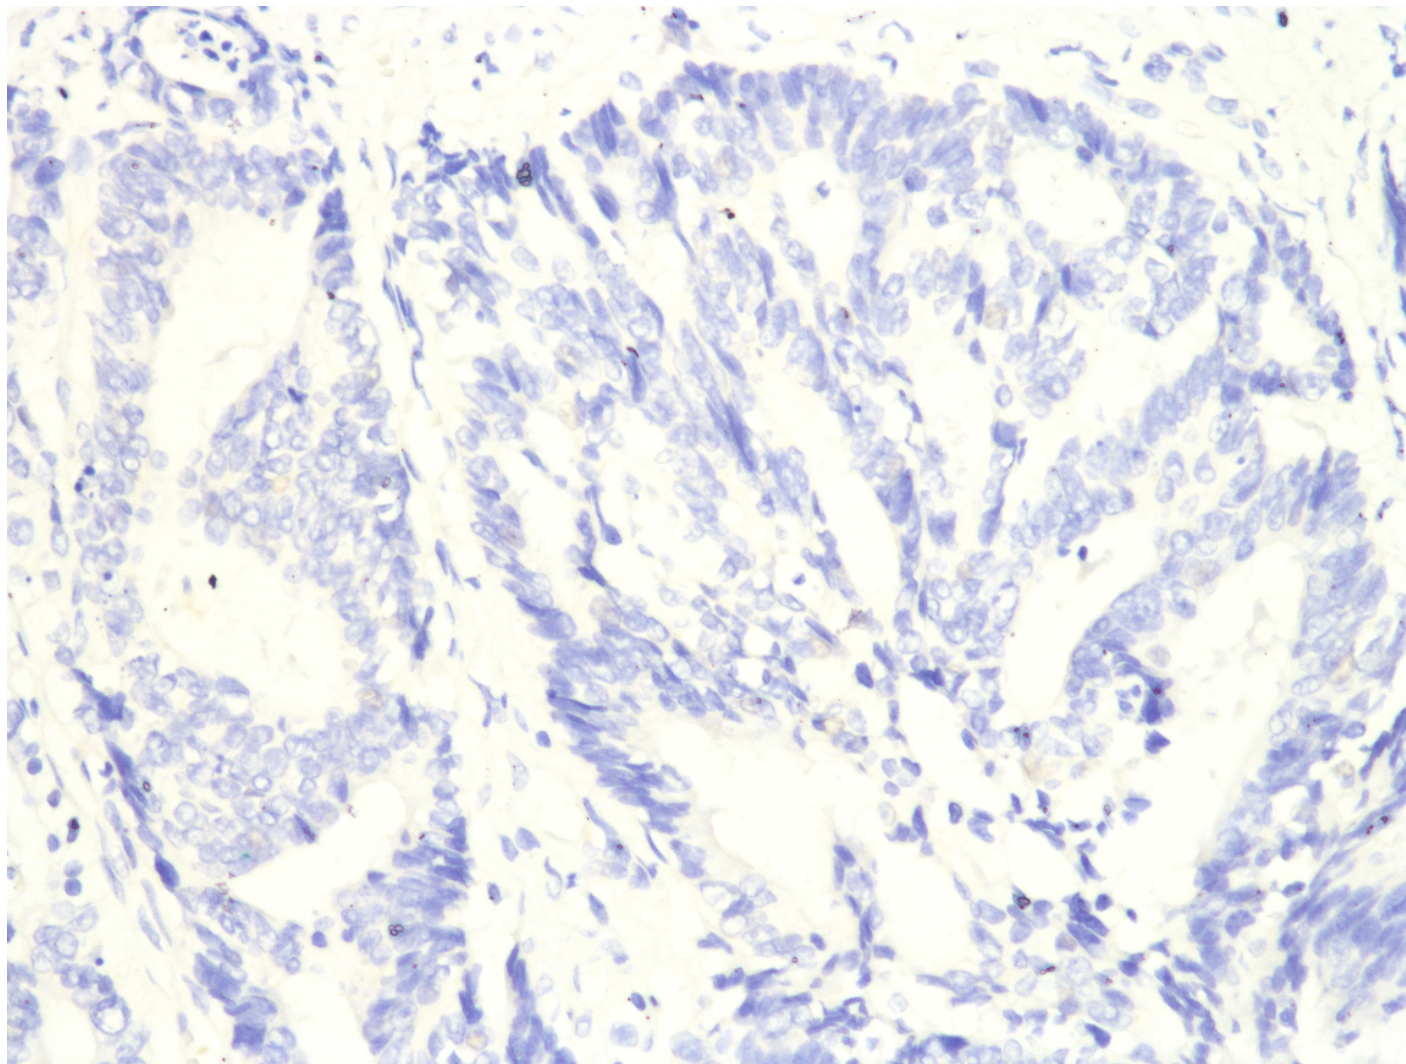

Supplement: s1 [file s1]
